# Supplementary material for: Physical activity and cardiometabolic health in adolescents with type 2 diabetes: a cross-sectional study
Source: PubMed Central journal article supplement — BMJ Open Diabetes Res Care. 2021 May 14;9(1):e002134. doi: 10.1136/bmjdrc-2021-002134 (PMC8127979; doi:10.1136/bmjdrc-2021-002134), 2021-05-14
Supplement: bmjdrc-2021-002134supp001.pdf [file bmjdrc-2021-002134supp001.pdf]

## Appendix

Table 1. Descriptive and outcome data of youth with type 2 diabetes stratified according to meeting daily recommendations for physical activity

| Variable                          | Not meeting guidelines | Met guidelines    | p      |
|-----------------------------------|------------------------|-------------------|--------|
| n                                 | 34                     | 122               |        |
| Female (n%)                       | 23 (67.6)              | 85 (68.0)         | 1.000  |
| Rural (n%)                        | 30 (88.2)              | 92 (75.4)         | 0.081  |
| Indigenous (n%)                   | 34 (100)               | 118 (96.7)        | 0.370  |
| Smoking (n%)                      | 15 (44.1)              | 31 (25.4)         | 0.031  |
| Mean age (yrs)                    | 15.3 (3.1)             | 15.1 (2.4)        | 0.649  |
| Median duration of diabetes (yrs) | 3.5 (3.0)              | 2.9 (2.1)         | 0.238  |
| Mean BMI Z score                  | 2.22 (1.08)            | 2.44 (1.08)       | 0.306  |
| Mean HbA1c (%)                    | 10.69 (2.59)           | 9.25 (2.53)       | 0.006  |
| Mean 24 hr SBP (mmHg)             | 127.8 (9.60)           | 126.8 (9.72)      | 0.655  |
| Mean 24hr DBP (mmHg)              | 75.7 (5.5)             | 73.6 (6.4)        | 0.078  |
| Mean 24 hr MAP (mmHg)             | 92.5 (5.9)             | 90.5 (6.5)        | 0.121  |
| Median daytime systolic load (%)  | 36.1 (29.3)            | 31.9 (25.5)       | 0.288  |
| Median daytime diastolic load (%) | 18.5 (15.4)            | 16.6 (16.0)       | 0.186  |
| Mean LDL (mmol/L)                 | 2.19 (0.58)            | 2.40 (0.67)       | 0.086  |
| Mean HDL (mmol/L)                 | 1.29 (0.50)            | 1.14 (0.28)       | 0.115  |
| Median triglycerides (mmol/L)     | 2.00 (1.40)            | 2.01 (1.96)       | 0.983  |
| Physical Activity (MET-Hr/week)   | 8.7 (0.0, 14.7)        | 62.6 (37.8,113.8) | <0.001 |

sTable 2. Descriptive and outcome data of youth with type 2 diabetes stratified according to participation in organized sport

| <b>Variable</b>                   | <b>No Org. Sport</b> | <b>Org Sport</b>   | <b>p</b> |
|-----------------------------------|----------------------|--------------------|----------|
| n                                 | 34                   | 122                |          |
| Female (n%)                       | 27 (79.4)            | 79 (64.7)          | 0.076    |
| Rural (n%)                        | 79 (82.3)            | 49 (77.0)          | 0.343    |
| Indigenous (n/%)                  | 34 (100)             | 118 (97.6)         | 0.370    |
| Smoking (n/%)                     | 20 (58.8)            | 26 (21.3)          | <0.001   |
| Mean age (yrs)                    | 16.9 (3.0)           | 14.7 (2.24)        | <0.001   |
| Median duration of diabetes (yrs) | 4.4 (3.0)            | 2.6 (1.9)          | 0.002    |
| Mean BMI Z score                  | 2.21 (1.18)          | 2.44 (1.05)        | 0.317    |
| Mean HbA1c (%)                    | 10.47 (2.36)         | 9.31 (2.62)        | 0.017    |
| Mean 24 hr SBP (mmHg)             | 128.3 (8.9)          | 126.7 (9.9)        | 0.376    |
| Mean 24hr DBP (mmHg)              | 76.0 (5.5)           | 73.5 (6.2)         | 0.052    |
| Mean 24 hr MAP (mmHg)             | 92.2 (6.1)           | 90.5 (6.5)         | 0.186    |
| Median daytime systolic load (%)  | 31.1 (27.4)          | 33.1 (26.0)        | 0.713    |
| Median daytime diastolic load (%) | 18.0 (14.8)          | 16.6 (16.2)        | 0.659    |
| Mean LDL (mmol/L)                 | 2.40 (0.73)          | 2.34 (0.64)        | 0.677    |
| Mean HDL (mmol/L)                 | 1.21 (0.52)          | 1.16 (0.28)        | 0.595    |
| Median triglycerides (mmol/L)     | 2.31 (1.69)          | 1.92 (1.90)        | 0.248    |
| Physical Activity (MET-Hr/week)   | 10.9 (0.0, 31.8)     | 59.4 (33.2, 113.8) | <0.001   |
